# Supplementary material for: The chelate-to-bridging shift of phosphane dipalladacycles: convenient synthesis of double A-frame tetranuclear complexes
Source: Royal Society of Chemistry journal article supplement (doi:10.1039/c8cc01046c), 2018-01-01
Supplement: c8cc01046c1.pdf [file c8cc01046c1.pdf]

## ESI

### Synthetic Details

**General Procedures.** Solvents were purified by standard methods.<sup>1</sup> Palladium(II) acetate, (*p*-NH<sub>2</sub>C<sub>6</sub>H<sub>4</sub>)<sub>2</sub>SO<sub>2</sub>, 2,3,4-(MeO)<sub>3</sub>C<sub>6</sub>H<sub>2</sub>CHO, (*p*-NH<sub>2</sub>C<sub>6</sub>H<sub>4</sub>)<sub>2</sub>O and the phosphine Ph<sub>2</sub>PCH<sub>2</sub>PPh<sub>2</sub> (dppm) were purchased from Sigma-Aldrich. All preparations were carried out under dry dinitrogen. Elemental analyses were performed with a Fisons elemental analyzer, Model 1108. IR spectra were recorded as Nujol mulls or polythene discs on Perking-Elmer 1330, Mattson Model Cygnus-100, and Bruker Model IFS-66V spectrophotometers. <sup>1</sup>H NMR spectra in solution were recorded in CDCl<sub>3</sub>, DMSO-*d*<sub>6</sub> or Acetone-*d*<sub>6</sub> at room temperature on Bruker DPX 250 and Varian Mercury 300 spectrometer operating at 250.13 MHz and 300.14 MHz respectively using 5 mm o.d. tubes; chemical shifts, in ppm, are reported downfield relative to TMS using the solvent signal (CDCl<sub>3</sub>, δ<sup>1</sup>H = 7.26 ppm; DMSO-*d*<sub>6</sub>, δ<sup>1</sup>H = 2.46 ppm; MeCOMe-*d*<sub>6</sub> δ<sup>1</sup>H = 2.05 ppm) as reference. <sup>31</sup>P NMR spectra were recorded at 161.91 MHz and 202.46 MHz on a Varian Inova 400 and Bruker AMX 500 spectrometer respectively using 5 mm o.d. tubes and are reported in ppm relative to external H<sub>3</sub>PO<sub>4</sub> (85%). Coupling constants are reported in Hz. All chemical shifts are reported downfield from standard

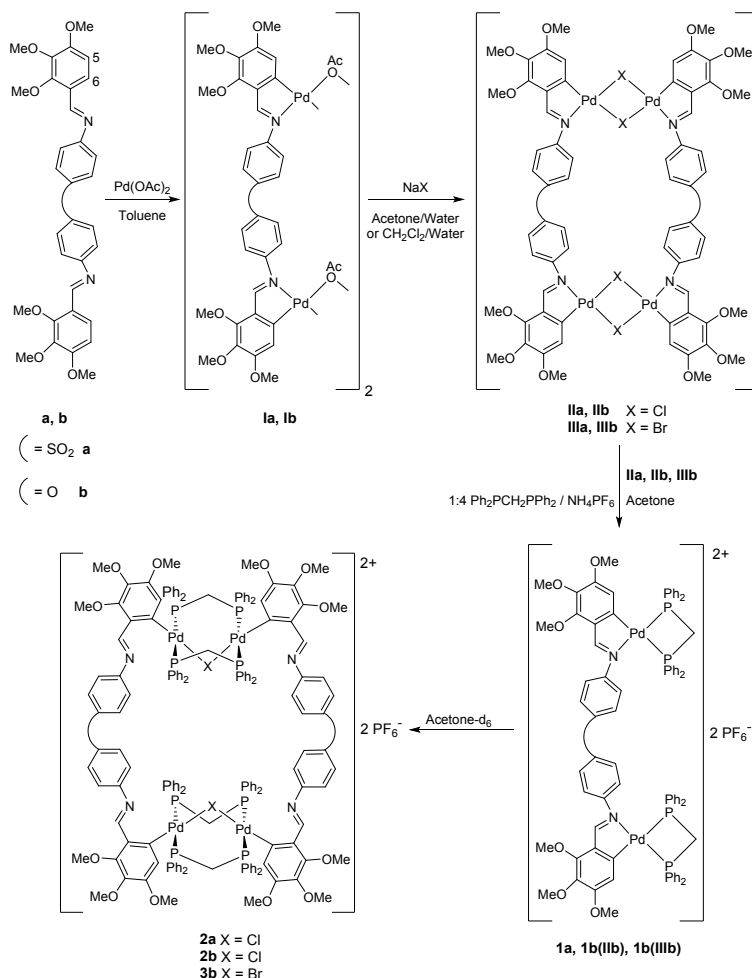

**Scheme 1** ESI Reaction sequence leading to the synthesis of the double A-frame complexes.

### Synthesis of [2,3,4-(MeO)<sub>3</sub>C<sub>6</sub>H<sub>2</sub>(CH)=NC<sub>6</sub>H<sub>4</sub>]<sub>2</sub>SO<sub>2</sub> (**a**)

<sup>1</sup> Perrin, D.D., Armarego, W.L.F. *Purification of Laboratory Chemicals*, Butterworth-Heinemann, London, 4<sup>th</sup> ed., 1996

A 1:2 mixture of (*p*-NH<sub>2</sub>C<sub>6</sub>H<sub>4</sub>)<sub>2</sub>SO<sub>2</sub> (2.57 g, 10.33 mmol) and 2,3,4-(MeO)<sub>3</sub>C<sub>6</sub>H<sub>2</sub>CHO (4.0 g, 20.39 mmol) in chloroform (50 cm<sup>3</sup>) was refluxed for 3 h. After cooling to room temperature, the solvent was removed under reduced pressure to give a yellow oil. Addition of diethyl ether and stirring for 24 h gave a pale-yellow solid, which was filtered and dried under vacuum. Yield: 4.891 g, 80%. Anal. Found: C: 63.4, H: 5.2, N: 4.6, S: 5.3 %; C<sub>32</sub>H<sub>32</sub>N<sub>2</sub>O<sub>8</sub>S (604.67 g/mol); requires C: 63.6, H: 5.3, N: 4.6, S: 5.3 %. IR(cm<sup>-1</sup>): ν(C=N) 1621. <sup>1</sup>H NMR (DMSO-d<sub>6</sub>, δ/ppm, J/Hz): 8.58 (s, 2H, HC=N), 7.94 (d, 4H, H7H8, *N* = 8.2), 7.74 (d, 2H, H6, <sup>3</sup>*J*H6H5 = 8.9), 7.33 (d, 4H, H9H10, *N* = 8.2), 6.94 (d, 2H, H5, <sup>3</sup>*J*H5H6 = 8.9), 3.90 (s, 6H, MeO), 3.84 (s, 6H, MeO), 3.74 (s, 6H, MeO).

#### Synthesis of [{Pd{2,3,4-(MeO)<sub>3</sub>C<sub>6</sub>H(CH)=NC<sub>6</sub>H<sub>4</sub>}(μ<sub>2</sub>-O<sub>2</sub>CMe)}<sub>2</sub>SO<sub>2</sub>]<sub>2</sub> (**1a**)

The ligand **a** (0.475 g, 0.785 mmol) and palladium(II) acetate (0.355 g, 1.580 mmol) were added in toluene (50 cm<sup>3</sup>) and the resulting mixture was stirred at 60° C for 24 h under argon. After cooling to r. t. the orange-brown solid formed was filtered off and dried under vacuum, to afford the final product as a dark orange solid. Yield: 0.70 g, 98%. Anal. Found: C 46.4, H 4.2, N 3.2, S 3.3 %; C<sub>72</sub>H<sub>72</sub>N<sub>4</sub>O<sub>24</sub>Pd<sub>4</sub>S<sub>2</sub> (1867.16 g/mol) requires C 46.3, H 3.9, N 3.0, S 3.4%. IR(cm<sup>-1</sup>): ν(C=N) 1566. <sup>1</sup>H NMR (DMSO-d<sub>6</sub>, δ ppm, *J* Hz): 8.26 (s, 4H, HC=N), 7.94 (m, 8H, H7H8), 7.52 (m, 8H, H9H10), 6.16 (s, 4H, H5), 3.83 (s, 12H, MeO), 3.77 (s, 12H, MeO), 3.65 (s, 12H, MeO), 1.91 (s, 12H, MeCO<sub>2</sub>).

#### Synthesis of [{Pd{2,3,4-(MeO)<sub>3</sub>C<sub>6</sub>H(CH)=NC<sub>6</sub>H<sub>4</sub>}(μ<sub>2</sub>-Cl)}<sub>2</sub>SO<sub>2</sub>]<sub>2</sub> (**1la**)

A solution of **1a** (0.407 g, 0.218 mmol) in 20 cm<sup>3</sup> of acetone was treated with a saturated solution of NaCl in ca. 20 cm<sup>3</sup> of water. The yellow precipitate formed was filtered off, washed with water and dried under vacuum. Yield: 393 mg, 88%. Anal. Found: C, 43.5, H, 3.2, N, 3.2, S 3.4 %; C<sub>64</sub>H<sub>60</sub>Cl<sub>4</sub>N<sub>4</sub>O<sub>16</sub>Pd<sub>4</sub>S<sub>2</sub> (1772.80 g/mol) requires C, 43.4, H, 3.4, N, 3.2, S, 3.6%. IR(cm<sup>-1</sup>): ν(C=N) 1570, ν(Pd-Cl) 309, 284. <sup>1</sup>H NMR (DMSO-d<sub>6</sub>, δ ppm, *J* Hz): 8.28 (s, 4H, HC=N), 7.96 (m, 8H, H7H8, *N* = 8.5), 7.54 (m, 8H, H9H10, *N* = 8.4), 6.16 (s, 4H, H5), 3.85 (s, 12H, MeO), 3.79 (s, 12H, MeO), 3.67 (s, 12H, MeO).

#### Synthesis of [{Pd{2,3,4-(MeO)<sub>3</sub>C<sub>6</sub>H(CH)=NC<sub>6</sub>H<sub>4</sub>}(μ<sub>2</sub>-Br)}<sub>2</sub>SO<sub>2</sub>]<sub>2</sub> (**1lla**)

A solution of **1a** (0.224 g, 0.120 mmol) in 20 cm<sup>3</sup> of acetone was treated with a saturated solution of LiBr in ca. 20 cm<sup>3</sup> of water. The yellow precipitate formed was filtered off, washed with water and dried under vacuum. Yield: 350 mg, 95.6%. Anal. Found: C, 39.4, H, 3.2, N, 3.0, S, 3.1 %; C<sub>64</sub>H<sub>60</sub>Br<sub>4</sub>N<sub>4</sub>O<sub>16</sub>Pd<sub>4</sub>S<sub>2</sub> (1950.61 g/mol) requires C, 39.4, H, 3.1, N, 2.9, S, 3.3%. IR(cm<sup>-1</sup>): ν(C=N) 1621. <sup>1</sup>H NMR (DMSO-d<sub>6</sub>, δ ppm, *J* Hz): 8.52 (m, 8H, H7H8, *N* = 8.5), 8.28 (s, 4H, HC=N), 7.95 (m, 8H, H9H10, *N* = 8.4), 7.38 (s, 4H, H5), 3.83 (s, 12H, MeO), 3.78 (s, 12H, MeO), 3.65 (s, 12H, MeO).

#### Synthesis of [Pd{2,3,4-(MeO)<sub>3</sub>C<sub>6</sub>H(CH)=NC<sub>6</sub>H<sub>4</sub>}(Ph<sub>2</sub>PCH<sub>2</sub>PPh<sub>2</sub>-*P,P*)<sub>2</sub>SO<sub>2</sub> · 2PF<sub>6</sub>] (**1a**)

Ph<sub>2</sub>PCH<sub>2</sub>PPh<sub>2</sub> (0.029 g, 0.075 mmol) was added to a suspension of **1la** (0.033 g, 0.019 mmol) in acetone (10 cm<sup>3</sup>). The mixture was stirred for 30 min, after which an excess of ammonium hexafluorophosphate was added. The mixture was stirred for a further 1 h, the complex precipitated out by addition of water, filtered off and dried *in vacuo*. IR(cm<sup>-1</sup>): νC=N: 1568. <sup>1</sup>H NMR (MeCOMe-d<sub>6</sub>, δ ppm, *J* Hz): 8.53 (d, 2H, HC=N, <sup>4</sup>*J*H<sub>P</sub><sub>trans</sub> = 5.9), 6.04 (dd, 2H, H5, <sup>4</sup>*J*H5P = 10.5, <sup>4</sup>*J*H5P = 7.9), 4.65 (m, 4H, PCH<sub>2</sub>P), 3.98 (s, 6H, MeO), 3.71 (s, 6H, MeO), 3.20 (s, 6H, MeO). <sup>31</sup>P-{<sup>1</sup>H} NMR (MeCOMe-d<sub>6</sub>, δ ppm, *J* Hz): -37.2 (d, P<sub>trans</sub>C, <sup>2</sup>*J*PP = 72.1), -12.9 (d, P<sub>trans</sub>N, <sup>2</sup>*J*PP = 72.1), -149.9 (sept, PF<sub>6</sub> <sup>1</sup>*J*PF = 709.5).

**Synthesis of  $\{[\text{Pd}\{2,3,4\text{-(MeO)}_3\text{C}_6\text{H}(\text{CH})=\text{NC}_6\text{H}_4\}(\mu\text{-Ph}_2\text{PCH}_2\text{PPh}_2\text{-}P,P)]_2(\mu\text{-Cl})\text{SO}_2\}_2 \cdot 2\text{PF}_6$  (2a)**

$\text{Ph}_2\text{PCH}_2\text{PPh}_2$  (8.5 mg, 0.022 mmol) and ammonium hexafluorophosphate (0.004 g, 0.024 mmol) were added to a solution of **IIa** (8.5 mg, 0.005 mmol) in acetone- $\text{d}_6$  (0.6  $\text{cm}^3$ ) and left to stand until complete conversion. Yield: 16 mg, 93% related to **IIa**. Anal. Found: %, C, 55.3, H, 4.4, N, 1.6, S, 1.8 %;  $\text{C}_{164}\text{H}_{148}\text{Cl}_2\text{F}_{12}\text{N}_4\text{O}_{16}\text{P}_{10}\text{Pd}_4\text{S}_2$  (3529.42 g/mol) requires C, 55.8, H, 4.2, N, 1.6, S, 1.8 % IR( $\text{cm}^{-1}$ ):  $\nu_{\text{C}=\text{N}}$ : 1597,  $\nu_{\text{Pd}-\text{Cl}}$ : 280m.  $^1\text{H}$  NMR (MeCOMe- $\text{d}_6$ ,  $\delta$  ppm,  $J$  Hz): 8.10 (s, 4H, HC=N), 7.02 (m, 4H, H5), 4.25 (s, 12H, MeO), 3.58 (s, 12H, MeO), 3.48 (s, 12H, MeO).  $^{31}\text{P}$ - $\{^1\text{H}\}$  NMR (MeCOMe- $\text{d}_6$ ,  $\delta$  ppm): 1.48 (s), -150.0 (sept,  $\text{PF}_6$ ,  $^1J_{\text{PF}}$  707.7).

**Synthesis of  $[2,3,4\text{-(MeO)}_3\text{C}_6\text{H}_2(\text{CH})=\text{NC}_6\text{H}_4]_2\text{O}$  (b)**

A 1:2 mixture of ( $p\text{-NH}_2\text{C}_6\text{H}_4$ ) $_2\text{O}$  (1.0 g, 4.99 mmol) and 2,3,4-(MeO) $_3\text{C}_6\text{H}_2\text{CHO}$  (2.0 g, 9.98 mmol) in ethanol (50  $\text{cm}^3$ ) was stirred at room temperature for 24 h. The white precipitate formed was filtered off, washed with water and dried under vacuum. Yield: 2.273 g, 82%. Anal. Found: C, 68.8, H, 5.9, N, 5.1 %;  $\text{C}_{32}\text{H}_{32}\text{N}_2\text{O}_7$  (556.61 g/mol) requires C, 69.0, H, 5.8, N, 5.0 %. IR( $\text{cm}^{-1}$ ):  $\nu_{\text{C}=\text{N}}$  1609.  $^1\text{H}$  NMR (DMSO- $\text{d}_6$ ,  $\delta$ /ppm,  $J$ /Hz): 8.64 (s, 2H, HC=N); 7.75 (d, 2H, H6,  $^3J_{\text{H6H5}} = 8.7$ ); 7.25 (d, 4H, H9H10,  $N = 8.3$ ); 7.03 (d, 4H, H7H8,  $N = 8.3$ ); 6.93 (d, 2H, H5,  $^3J_{\text{H5H6}} = 8.7$ ); 3.86 (s, 6H, MeO); 3.84 (s, 6H, MeO); 3.75 (s, 6H, MeO).

**Synthesis of  $\{[\text{Pd}\{2,3,4\text{-(MeO)}_3\text{C}_6\text{H}(\text{CH})=\text{NC}_6\text{H}_4\}(\mu\text{-O}_2\text{CMe})]_2\text{O}\}_2$  (Ib)**

The ligand **b** (0.500 g, 0.898 mmol) and palladium(II) acetate (0.403 g, 1.795 mmol) were added in toluene (30  $\text{cm}^3$ ) and the resulting mixture was stirred at 55° C for 24 h. After cooling to r. t. the red oil formed was separated, to afford the final product as a red solid. Yield: 300 mg, 40%. Anal. Found: C 48.6, H 4.2, N 3.3 %;  $\text{C}_{72}\text{H}_{72}\text{N}_4\text{O}_{22}\text{Pd}_4$  (1771.04 g/mol) requires C 48.8, H 4.1, N 3.2 %. IR( $\text{cm}^{-1}$ ):  $\nu_{\text{C}=\text{N}}$  1564.  $^1\text{H}$  NMR (DMSO- $\text{d}_6$ ,  $\delta$  ppm,  $J$  Hz): 8.02 (s, 4H, HC=N), 6.97 (d, 8H, H9H10,  $N = 8.3$ ); 6.76 (d, 8H, H7H8,  $N = 8.3$ ), 5.92 (s, 4H, H5), 3.74 (s, 12H, MeO), 3.65 (s, 12H, MeO), 3.57 (s, 12H, MeO), 2.17 (s, 6H,  $\text{MeCO}_2$ ), 1.48 (s, 6H,  $\text{MeCO}_2$ ).

**Synthesis of  $\{[\text{Pd}\{2,3,4\text{-(MeO)}_3\text{C}_6\text{H}(\text{CH})=\text{NC}_6\text{H}_4\}(\mu_2\text{-Cl})]_2\text{O}\}_2$  (IIb)**

A solution of **Ib** (0.472 g, 0.266 mmol) in 25  $\text{cm}^3$  of dichloromethane was treated with a 0.05M solution of NaCl in ca. 35  $\text{cm}^3$  of water. The organic part was separated and the solvent was removed under reduced pressure. Later the residue was recrystallized on a mixture of dichloromethane-hexane giving a yellow solid. Yield: 312.8 mg, 70%. Anal. Found: C, 46.2, H, 3.7, N, 3.2 %  $\text{C}_{64}\text{H}_{60}\text{Cl}_4\text{N}_4\text{O}_{14}\text{Pd}_4$  (1676.67 g/mol) requires C, 45.9, H, 3.6, N, 3.3 %. IR( $\text{cm}^{-1}$ ):  $\nu_{\text{C}=\text{N}}$ : 1572,  $\nu_{\text{Pd}-\text{Cl}}$ : 310,  $\nu_{\text{Pd}-\text{Cl}}$ : 294.  $^1\text{H}$  NMR ( $\text{CDCl}_3$ ,  $\delta$  ppm,  $J$  Hz): 8.08 (s, 4H, HC=N), 7.24 (d, 8H, -O-*Ph*,  $N = 8.7$ ), 6.91 (d, 8H, -O-*Ph*,  $N = 8.7$ ), 6.74 (s, 4H, H5), 3.97 (s, 12H, MeO), 3.94 (s, 12H, MeO), 3.79 (s, 12H, MeO).

**Synthesis of  $\{[\text{Pd}\{2,3,4\text{-(MeO)}_3\text{C}_6\text{H}(\text{CH})=\text{NC}_6\text{H}_4\}(\mu_2\text{-Br})]_2\text{O}\}_2$  (IIIb)**

A solution of **Ib** (0.100 g, 0.056 mmol) in 10  $\text{cm}^3$  of dichloromethane was treated with a 0.05M solution of NaBr in ca. 8  $\text{cm}^3$  of water. The organic part was separated and the solvent was removed under reduced pressure. Later the residue was recrystallized on a mixture of dichloromethane-hexane giving a red solid. Yield: 35.5 mg, 34%. Anal. Found: C, 41.2, H, 3.2, N, 3.1 %;  $\text{C}_{64}\text{H}_{60}\text{Br}_4\text{N}_4\text{O}_{14}\text{Pd}_4$  (1854.48 g/mol) requires C, 41.5, H, 3.3, N, 3.0 %. IR( $\text{cm}^{-1}$ ):  $\nu_{\text{C}=\text{N}}$ : 1570.  $^1\text{H}$  NMR ( $\text{CDCl}_3$ ,  $\delta$  ppm,  $J$  Hz): 8.12 (s, 4H, HC=N), 7.24 (d, 8H, -O-*Ph*,  $N = 9.3$ ), 6.93 (d, 8H, -O-*Ph*,  $N = 9.3$ ), 6.91 (s, 4H, H5), 3.96 (s, 12H, MeO), 3.95 (s, 12H, MeO), 3.79 (s, 12H, MeO).  $^1\text{H}$  NMR (DMSO- $\text{d}_6$ ,  $\delta$  ppm,  $J$  Hz): 8.20 (s, 4H, HC=N), 7.30 (m, 8H, -O-*Ph*,  $N = 7.5$ ), 7.30 (s, 4H, H5), 6.99 (m, 8H, -O-*Ph*,  $N = 7.5$ ), 3.83 (s, 12H, MeO), 3.75 (s, 12H, MeO), 3.64 (s, 12H, MeO).

**Synthesis of  $[\text{Pd}\{2,3,4\text{-(MeO)}_3\text{C}_6\text{H}(\text{CH})=\text{NC}_6\text{H}_4\}(\text{Ph}_2\text{PCH}_2\text{PPh}_2\text{-}P,P)]_2\text{O} \cdot 2\text{PF}_6$  (**1b**)**

$\text{Ph}_2\text{PCH}_2\text{PPh}_2$  (8.5 mg, 0.022 mmol) and ammonium hexafluorophosphate (0.004 g, 0.024 mmol) were added to a solution of **IIb** (8.5 mg, 0.005 mmol) or **IIIb** (0.093 g, 0.005 mmol) in acetone (0.6 cm<sup>3</sup>). <sup>1</sup>H NMR (MeCOMe-d<sub>6</sub>, δ ppm, J Hz): 8.50 (d, 2H, HC=N, <sup>4</sup>J<sub>HP</sub><sub>trans</sub> 6.8), 7.25 (d, 4H, H<sub>9</sub>H<sub>10</sub>, N = 8.5), 6.55 (d, 4H, H<sub>7</sub>H<sub>8</sub>, N = 8.5), 6.01 (m, 2H, H<sub>5</sub>), 4.60 (m, 4H, PCH<sub>2</sub>P, N = 19.6), 3.97 (s, 6H, MeO), 3.69 (s, 6H, MeO), 3.15 (s, 6H, MeO). <sup>31</sup>P-{<sup>1</sup>H} NMR (MeCOMe-d<sub>6</sub>, δ ppm, J Hz): -36.0 (d, <sup>2</sup>J<sub>PP</sub> 63.0), -12.2 (d, <sup>2</sup>J<sub>PP</sub> 63.0), -150.0 (sept, PF<sub>6</sub>, <sup>1</sup>J<sub>PF</sub> 707.7).

**Synthesis of  $\{[\text{Pd}\{2,3,4\text{-(MeO)}_3\text{C}_6\text{H}(\text{CH})=\text{NC}_6\text{H}_4\}(\mu\text{-Ph}_2\text{PCH}_2\text{PPh}_2\text{-}P,P)]_2(\mu\text{-Cl})\text{O}\}_2 \cdot 2\text{PF}_6$  (**2b**)**

$\text{Ph}_2\text{PCH}_2\text{PPh}_2$  (8.5 mg, 0.022 mmol) and ammonium hexafluorophosphate (0.004 g, 0.024 mmol) were added to a solution of **IIb** (8.5 mg, 0.005 mmol) in acetone-d<sub>6</sub> (0.6 cm<sup>3</sup>) and left to stand until complete conversion. Yield: 16 mg, 95% related to **IIb**. Anal. Found: C, 57.2, H, 4.5, N, 1.7 %; C<sub>164</sub>H<sub>148</sub>Cl<sub>2</sub>F<sub>12</sub>N<sub>4</sub>O<sub>14</sub>P<sub>10</sub>Pd<sub>4</sub> (3433.25 g/mol) requires C, 57.4, H, 4.4, N, 1.6 %. IR(cm<sup>-1</sup>): ν<sub>C=N</sub>: 1594, ν<sub>Pd-Cl</sub>: 279m. <sup>1</sup>H NMR (MeCOMe-d<sub>6</sub>, δ ppm, J Hz): 8.12 (s, 4H, HC=N), 7.00 (m, 4H, H<sub>5</sub>), 6.57 (d, 8H, H<sub>7</sub>H<sub>8</sub>, N = 8.7), 4.38 (m, 8H, PCH<sub>2</sub>P), 4.23 (s, 12H, MeO), 3.55 (s, 12H, MeO), 3.42 (s, 12H, MeO). <sup>31</sup>P-{<sup>1</sup>H} NMR (MeCOMe-d<sub>6</sub>, δ ppm): 1.5 (s, 1P), -150.0 (sept, <sup>1</sup>J<sub>PF</sub> 707.7).

**Synthesis of  $\{[\text{Pd}\{2,3,4\text{-(MeO)}_3\text{C}_6\text{H}(\text{CH})=\text{NC}_6\text{H}_4\}(\mu\text{-Ph}_2\text{PCH}_2\text{PPh}_2\text{-}P,P)]_2(\mu\text{-Br})\text{O}\}_2 \cdot 2\text{PF}_6$  (**3b**)**

$\text{Ph}_2\text{PCH}_2\text{PPh}_2$  (7.1 mg, 0.018 mmol) and ammonium hexafluorophosphate (0.003 g, 0.018 mmol) were added to a solution of **IIIb** (8.5 mg, 0.0046 mmol) in acetone-d<sub>6</sub> (0.6 cm<sup>3</sup>) and left to stand until complete conversion. Yield: 14 mg, 90% related to **IIIb**. Anal. Found: C, 55.9; H, 4.2; N, 1.6 %; C<sub>164</sub>H<sub>148</sub>Br<sub>2</sub>F<sub>12</sub>N<sub>4</sub>O<sub>14</sub>P<sub>10</sub>Pd<sub>4</sub> (3522.21 g/mol) requires C, 55.9; H, 4.2; N, 1.6 %. IR(cm<sup>-1</sup>): ν<sub>C=N</sub>: 1590. <sup>1</sup>H NMR (MeCOMe-d<sub>6</sub>, δ ppm, J Hz): 8.16 (s, 4H, HC=N), 7.05 (m, 4H, H<sub>5</sub>), 4.60 (m, 8H, PCH<sub>2</sub>P), 4.23 (s, 12H, MeO), 3.55 (s, 12H, MeO), 3.43 (s, 12H, MeO). <sup>31</sup>P-{<sup>1</sup>H} NMR (MeCOMe-d<sub>6</sub>, δ ppm): 0.66 (s, 1P), -150.0 (sept, <sup>1</sup>J<sub>PF</sub> 707.7).

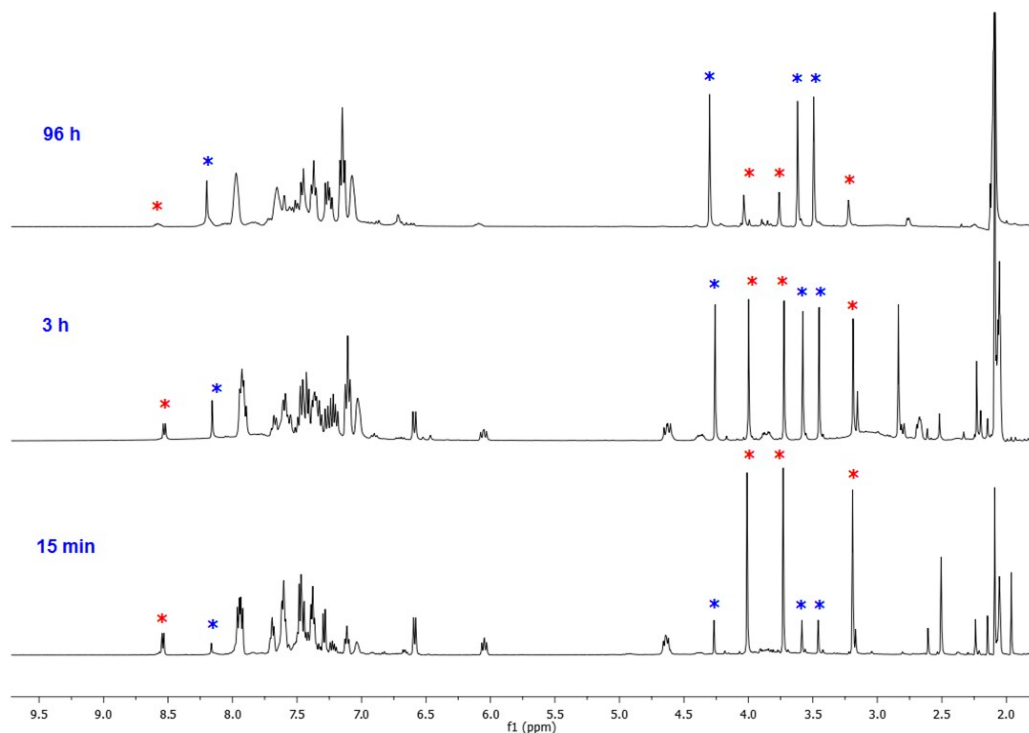

**Figure 1ESI.** Time-dependent <sup>1</sup>H NMR plot for the **1a** → **2a** shift at r.t. Compound **1a**, \*. Compound **2a**, \*.

### Crystal Structure Analysis

Three-dimensional, X-ray data were collected on a Bruker Kappa-APEX II; Siemens Smart CCD diffractometer by the  $\omega$  scan method using graphite-monochromated Mo-K $\alpha$  radiation. All the measured reflections were corrected for Lorentz and polarisation effects and for absorption by semi-empirical methods based on symmetry-equivalent and repeated reflections. The structures were solved by direct methods and refined by full matrix least squares on  $F^2$ . Hydrogen atoms were included in calculated positions. Refinement converged at a final R1 = 0.0773 and wR2 = 0.1950 (compound **2a**), R1 = 0.0442, wR2 = 0.1292 (compound **2b**), R1 = 0.0437 and wR2 = 0.1252 (compound **3b**) with allowance for thermal anisotropy of all non-hydrogen atoms. The structure solution and refinement were carried out using the program package SHELX-97.

**Table 1** Crystal data and structure refinement for **2a**.

|                                 |                                                                                                                                                 |             |   |
|---------------------------------|-------------------------------------------------------------------------------------------------------------------------------------------------|-------------|---|
| Identification code             | <b>2a</b>                                                                                                                                       |             |   |
| Empirical formula               | C <sub>173</sub> H <sub>163</sub> Cl <sub>8</sub> F <sub>12</sub> N <sub>4</sub> O <sub>18</sub> P <sub>10</sub> Pd <sub>4</sub> S <sub>2</sub> |             |   |
| Formula weight                  | 3897.09                                                                                                                                         |             |   |
| Temperature                     | 100(2) K                                                                                                                                        |             |   |
| Wavelength                      | 0.71073 Å                                                                                                                                       |             |   |
| Crystal system                  | Monoclinic                                                                                                                                      |             |   |
| Space group                     | P21/n                                                                                                                                           |             |   |
| Unit cell dimensions            | a = 14.8431(11) Å                                                                                                                               | α = 90°.    |   |
|                                 | b = 26.413(2) Å                                                                                                                                 | β =         |   |
|                                 | 93.090(6)°.                                                                                                                                     |             |   |
|                                 | c = 22.3504(19) Å                                                                                                                               | γ = 90°.    |   |
| Volume                          | 8749.8(12) Å <sup>3</sup>                                                                                                                       |             |   |
| Z                               | 2                                                                                                                                               |             |   |
| Density (calculated)            | 1.479 Mg/m <sup>3</sup>                                                                                                                         |             |   |
| Absorption coefficient          | 0.718 mm <sup>-1</sup>                                                                                                                          |             |   |
| F(000)                          | 3966                                                                                                                                            |             |   |
| Crystal size                    | 0.19 x 0.18 x 0.08 mm <sup>3</sup>                                                                                                              |             |   |
| Theta range for data collection | 1.58 to 24.43°.                                                                                                                                 |             |   |
| Index ranges                    | -17<=h<=16,<br>24<=l<=25                                                                                                                        | -30<=k<=30, | - |
| Reflections collected           | 87544                                                                                                                                           |             |   |
| Independent reflections         | 14410 [R(int) = 0.2121]                                                                                                                         |             |   |
| Completeness to theta = 24.43°  | 99.8 %                                                                                                                                          |             |   |
| Absorption correction           | Semi-empirical from equivalents                                                                                                                 |             |   |
| Max. and min. transmission      | 0.928 and 0.865                                                                                                                                 |             |   |
| Refinement method               | Full-matrix least-squares on F <sup>2</sup>                                                                                                     |             |   |
| Data / restraints / parameters  | 14410 / 42 / 1074                                                                                                                               |             |   |
| Goodness-of-fit on F2           | 0.992                                                                                                                                           |             |   |
| Final R indices [I>2sigma(I)]   | R1 = 0.0773, wR2 = 0.1950                                                                                                                       |             |   |
| R indices (all data)            | R1 = 0.1533, wR2 = 0.2570                                                                                                                       |             |   |
| Largest diff. peak and hole     | 2.323 and -0.890 e.Å <sup>-3</sup>                                                                                                              |             |   |

**Table 2** Selected bond lengths [Å] for **2a**

Pd(1)-C(1) 1.996(9) C(30)- 1.863(9)

|                 |                |                        |                |
|-----------------|----------------|------------------------|----------------|
| Pd(1)-P(1)      | 2.334(3)       | P(1)<br>C(30)-<br>P(2) | 1.833(9)       |
| Pd(1)-P(3)      | 2.342(3)       | C(31)-<br>P(3)         | 1.816(9)       |
| Pd(1)-<br>Cl(1) | 2.452(2)       | C(31)-<br>P(4)         | 1.859(9)       |
| Pd(2)-<br>C(17) | 2.002(1)<br>0) | C(7)-N(1)              | 1.284(1)<br>2) |
| Pd(2)-P(2)      | 2.299(3)       | C(23)-<br>N(2)         | 1.266(1)<br>2) |
| Pd(2)-P(4)      | 2.326(3)       | C(11)-<br>S(1)         | 1.754(9)       |
| Pd(2)-<br>Cl(1) | 2.416(2)       | C(28)-<br>S(1)         | 1.761(1)<br>0) |
| Pd(1)-<br>Pd(2) | 3.253(1)       |                        |                |

**Table 3** Selected angles [°] for **2a**

|                       |                 |                       |          |
|-----------------------|-----------------|-----------------------|----------|
| C(1)-Pd(1)-P(1)       | 88.9(3)         | P(4)-Pd(2)-<br>Cl(1)  | 95.75(9) |
| C(1)-Pd(1)-P(3)       | 87.8(3)         | Pd(2)-Cl(1)-<br>Pd(1) | 83.87(8) |
| P(1)-Pd(1)-P(3)       | 168.20(9)       | P(2)-C(30)-P(1)       | 116.6(5) |
| C(1)-Pd(1)-<br>Cl(1)  | 175.6(3)        | P(3)-C(31)-P(4)       | 116.8(5) |
| P(1)-Pd(1)-<br>Cl(1)  | 92.60(9)        | O(7)-S(1)-O(8)        | 118.2(5) |
| P(3)-Pd(1)-<br>Cl(1)  | 91.54(9)        | O(7)-S(1)-<br>C(11)   | 108.7(5) |
| C(17)-Pd(2)-<br>P(2)  | 88.7(3)         | O(8)-S(1)-<br>C(11)   | 108.3(5) |
| C(17)-Pd(2)-<br>P(4)  | 86.5(3)         | O(7)-S(1)-<br>C(28)   | 108.1(5) |
| P(2)-Pd(2)-P(4)       | 173.61(1)<br>0) | O(8)-S(1)-<br>C(28)   | 107.3(5) |
| C(17)-Pd(2)-<br>Cl(1) | 171.8(3)        | C(11)-S(1)-<br>C(28)  | 105.6(4) |
| P(2)-Pd(2)-<br>Cl(1)  | 88.41(9)        |                       |          |

**Table 4** Crystal data and structure refinement for **2b**

|                      |                                                                                                                                  |                 |
|----------------------|----------------------------------------------------------------------------------------------------------------------------------|-----------------|
| Identification code  | <b>2b</b>                                                                                                                        |                 |
| Empirical formula    | C <sub>176</sub> H <sub>172</sub> Cl <sub>2</sub> F <sub>12</sub> N <sub>4</sub> O <sub>20</sub> P <sub>10</sub> Pd <sub>4</sub> |                 |
| Formula weight       | 3697.37                                                                                                                          |                 |
| Temperature          | 97(2) K                                                                                                                          |                 |
| Wavelength           | 0.71073 Å                                                                                                                        |                 |
| Crystal system       | Triclinic                                                                                                                        |                 |
| Space group          | P-1                                                                                                                              |                 |
| Unit cell dimensions | a = 16.4987(6) Å                                                                                                                 | α = 82.897(2)°. |
|                      | b = 16.5332(6) Å                                                                                                                 | β = 71.882(2)°. |
|                      | c = 17.1548(5) Å                                                                                                                 | γ = 75.240(2)°. |
| Volume               | 4295.6(3) Å <sup>3</sup>                                                                                                         |                 |

|                                   |                                             |
|-----------------------------------|---------------------------------------------|
| Z                                 | 1                                           |
| Density (calculated)              | 1.429 Mg/m <sup>3</sup>                     |
| Absorption coefficient            | 0.614 mm <sup>-1</sup>                      |
| F(000)                            | 1892                                        |
| Crystal size                      | 0.250 x 0.220 x 0.160 mm <sup>3</sup>       |
| Theta range for data collection   | 1.275 to 25.000°                            |
| Index ranges                      | -19<=h<=19, -19<=k<=19, -20<=l<=20          |
| Reflections collected             | 140354                                      |
| Independent reflections           | 15101 [R(int) = 0.0442]                     |
| Completeness to theta = 25.000°   | 99.8 %                                      |
| Absorption correction             | Semi-empirical from equivalents             |
| Max. and min. transmission        | 0.9010 and 0.8216                           |
| Refinement method                 | Full-matrix least-squares on F <sup>2</sup> |
| Data / restraints / parameters    | 15101 / 774 / 1046                          |
| Goodness-of-fit on F <sup>2</sup> | 1.091                                       |
| Final R indices [I>2sigma(I)]     | R1 = 0.0442, wR2 = 0.1292                   |
| R indices (all data)              | R1 = 0.0515, wR2 = 0.1339                   |
| Largest diff. peak and hole       | 2.151 and -0.969 e.Å <sup>-3</sup>          |

**Table 5** Selected bond lengths [Å] for **2b**

|             |           |              |          |
|-------------|-----------|--------------|----------|
| Pd(1)-C(1)  | 1.997(4)  | P(1)-C(81)   | 1.844(3) |
| Pd(1)-P(2)  | 2.3228(8) | P(2)-C(81)   | 1.834(3) |
| Pd(1)-P(4)  | 2.3331(9) | P(3)-C(26)   | 1.832(4) |
| Pd(1)-Cl(1) | 2.4328(8) | P(4)-C(26)   | 1.831(4) |
| Pd(1)-Pd(2) | 3.1735(4) | N(1)-C(7)    | 1.271(5) |
| Pd(2)-C(82) | 1.994(4)  | N(2)-C(20)#1 | 1.278(5) |
| Pd(2)-P(3)  | 2.3168(9) | O(7)-C(11)   | 1.388(5) |
| Pd(2)-P(1)  | 2.3569(9) | O(7)-C(14)   | 1.400(5) |
| Pd(2)-Cl(1) | 2.4607(9) | Pd(1)-Pd(2)  | 3.173(4) |

**Table 6** Selected angles [°] for **2b**

|                  |            |                   |            |
|------------------|------------|-------------------|------------|
| C(1)-Pd(1)-P(2)  | 84.98(10)  | P(3)-Pd(2)-P(1)   | 168.01(3)  |
| C(1)-Pd(1)-P(4)  | 85.96(10)  | C(82)-Pd(2)-Cl(1) | 176.62(11) |
| P(2)-Pd(1)-P(4)  | 168.62(3)  | P(3)-Pd(2)-Cl(1)  | 91.27(3)   |
| C(1)-Pd(1)-Cl(1) | 171.66(10) | P(1)-Pd(2)-Cl(1)  | 96.33(3)   |
| P(2)-Pd(1)-Cl(1) | 93.40(3)   | Pd(1)-Cl(1)-      | 80.85(3)   |

|              |           |                 |          |
|--------------|-----------|-----------------|----------|
| Cl(1)        |           | Pd(2)           |          |
| P(4)-Pd(1)-  | 94.58(3)  | P(4)-C(26)-P(3) | 117.2(2) |
| Cl(1)        |           |                 |          |
| C(82)-Pd(2)- | 85.79(10) | P(2)-C(81)-P(1) | 115.01(1 |
| P(3)         |           |                 | 7)       |
| C(82)-Pd(2)- | 86.30(10) | C(11)-O(7)-     | 117.9(3) |
| P(1)         |           | C(14)           |          |

**Table 7** Crystal data and structure refinement for **3b**.

|                                   |                                                                                                                |
|-----------------------------------|----------------------------------------------------------------------------------------------------------------|
| Identification code               | <b>3b</b>                                                                                                      |
| Empirical formula                 | C <sub>85</sub> H <sub>80</sub> Br F <sub>6</sub> N <sub>2</sub> O <sub>8</sub> P <sub>5</sub> Pd <sub>2</sub> |
| Formula weight                    | 1819.07                                                                                                        |
| Temperature                       | 100(2) K                                                                                                       |
| Wavelength                        | 0.71073 Å                                                                                                      |
| Crystal system                    | Triclinic                                                                                                      |
| Space group                       | P-1                                                                                                            |
|                                   | a = 16.4980(17) Å    α =                                                                                       |
|                                   | 83.263(7)°.                                                                                                    |
| Unit cell dimensions              | b = 16.5610(16) Å    β =                                                                                       |
|                                   | 71.977(7)°.                                                                                                    |
|                                   | c = 17.1294(19) Å    γ =                                                                                       |
|                                   | 75.228(7)°.                                                                                                    |
| Volume                            | 4299.7(8) Å <sup>3</sup>                                                                                       |
| Z                                 | 2                                                                                                              |
| Density (calculated)              | 1.405 Mg/m <sup>3</sup>                                                                                        |
| Absorption coefficient            | 1.042 mm <sup>-1</sup>                                                                                         |
| F(000)                            | 1848                                                                                                           |
| Crystal size                      | 0.160 x 0.150 x 0.090 mm <sup>3</sup>                                                                          |
| Theta range for data collection   | 1.273 to 25.000°.                                                                                              |
| Index ranges                      | -19 ≤ h ≤ 19, -19 ≤ k ≤ 19, -                                                                                  |
|                                   | 20 ≤ l ≤ 20                                                                                                    |
| Reflections collected             | 122609                                                                                                         |
| Independent reflections           | 15141 [R(int) = 0.0595]                                                                                        |
| Completeness to theta =           | 99.9 %                                                                                                         |
| 25.000°                           |                                                                                                                |
| Absorption correction             | Semi-empirical from equivalents                                                                                |
| Max. and min. transmission        | 0.912 and 0.851                                                                                                |
| Refinement method                 | Full-matrix least-squares on F <sup>2</sup>                                                                    |
| Data / restraints / parameters    | 15141 / 0 / 962                                                                                                |
| Goodness-of-fit on F <sup>2</sup> | 1.265                                                                                                          |
| Final R indices [I > 2σ(I)]       | R1 = 0.0437, wR2 = 0.1252                                                                                      |
| R indices (all data)              | R1 = 0.0547, wR2 = 0.1301                                                                                      |
| Largest diff. peak and hole       | 2.036 and -0.918 e.Å <sup>-3</sup>                                                                             |

**Table 8** Selected bond lengths [Å] for **3b**

|            |            |       |          |
|------------|------------|-------|----------|
| Pd(1)-     | 2.006(4)   | P(2)- | 1.831(4) |
| C(20)      |            | C(55) |          |
| Pd(1)-P(2) | 2.3237(10) | P(3)- | 1.847(4) |
|            |            | C(55) |          |

|             |            |            |          |
|-------------|------------|------------|----------|
| Pd(1)-P(5)  | 2.3338(11) | P(4)-C(30) | 1.828(4) |
| Pd(1)-Br(3) | 2.5459(5)  | P(5)-C(30) | 1.835(4) |
| Pd(2)-C(1)  | 1.995(4)   | N(1)-C(7)  | 1.281(5) |
| Pd(2)-P(4)  | 2.3168(11) | N(2)-C(26) | 1.276(5) |
| Pd(2)-P(3)  | 2.3557(11) | O(1)-C(15) | 1.388(5) |
| Pd(2)-Br(3) | 2.5722(6)  | O(1)-C(11) | 1.404(5) |
| Pd(1)-Pd(2) | 3.222(5)   |            |          |

**Table 9** Selected angles [°] for **3b**

|                   |           |                   |           |
|-------------------|-----------|-------------------|-----------|
| C(20)-Pd(1)-P(2)  | 85.06(11) | P(4)-Pd(2)-P(3)   | 167.17(4) |
| C(20)-Pd(1)-P(5)  | 85.55(11) | C(1)-Pd(2)-Br(3)  | 176.49(1) |
| P(2)-Pd(1)-P(5)   | 167.79(4) | P(4)-Pd(2)-Br(3)  | 91.19(3)  |
| C(20)-Pd(1)-Br(3) | 171.50(1) | P(3)-Pd(2)-Br(3)  | 96.77(3)  |
| P(2)-Pd(1)-Br(3)  | 93.90(3)  | Pd(1)-Br(3)-Pd(2) | 78.039(7) |
| P(5)-Pd(1)-Br(3)  | 94.24(3)  | P(2)-C(55)-P(3)   | 115.8(2)  |
| C(1)-Pd(2)-P(4)   | 85.70(11) | P(4)-C(30)-P(5)   | 118.2(2)  |
| C(1)-Pd(2)-P(3)   | 86.02(12) | C(15)-O(1)-C(11)  | 117.9(3)  |

**Table 10** Interactions between the dpdm and the aromatic rings of the ditopic linkers for:

**2a**

| $\pi \cdots \pi$ interactions                               | Cg $\cdots$ Cg | $\alpha$ | $\beta$ | $\gamma$ |
|-------------------------------------------------------------|----------------|----------|---------|----------|
| Cg(1) $\cdots$ Cg(2)                                        | 3.612 Å        | 20.0°    | 18.7°   | 23.7°    |
| Cg(1) $\cdots$ Cg(3)                                        | 3.587 Å        | 18.5°    | 12.5°   | 14.9°    |
| Cg rings (1): C(1)-C(6); (2): C(32)-C(37); (3): C(56)-C(61) |                |          |         |          |

**2b**

| $\pi \cdots \pi$ interactions                               | Cg $\cdots$ Cg | $\alpha$ | $\beta$ | $\gamma$ |
|-------------------------------------------------------------|----------------|----------|---------|----------|
| Cg(1) $\cdots$ Cg(2)                                        | 3.668 Å        | 23.3°    | 11.3°   | 18.9°    |
| Cg(1) $\cdots$ Cg(3)                                        | 3.657 Å        | 17.2°    | 21.6 °  | 26.4     |
| Cg rings (1): C(1)-C(6); (2): C(45)-C(50); (3): C(69)-C(74) |                |          |         |          |

**3b**

| $\pi \cdots \pi$ interactions                               | Cg $\cdots$ Cg | $\alpha$ | $\beta$ | $\gamma$ |
|-------------------------------------------------------------|----------------|----------|---------|----------|
| Cg(1) $\cdots$ Cg(2)                                        | 3.881 Å        | 29.0°    | 14.4°   | 26.3°    |
| Cg(1) $\cdots$ Cg(3)                                        | 3.592 Å        | 21.7°    | 2.2°    | 19.7°    |
| Cg rings (1): C(1)-C(6); (2): C(49)-C(54); (3): C(74)-C(79) |                |          |         |          |

**DFT report A-frame****Reaction studied**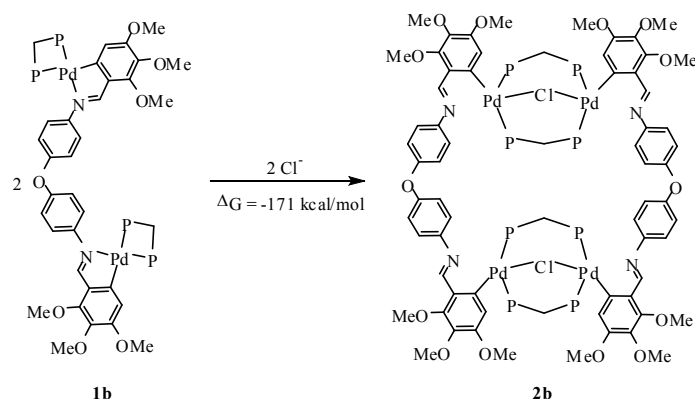**Scheme 2ESI:** P = PPh<sub>2</sub>.

In this case, both structures **1b** and **2b**, have been optimised using the package of programs g09<sup>2</sup> and to the B3LYP/LANL2DZ-ECP<sup>3</sup>/6-31-G(d) level of theory, frequency calculations were also performed giving not imaginary frequencies and thus confirming the stationary point in each case. For compound **1b** two conformers were found according to the rotation of the COC angle of the ether link between the cyclometalated moieties (**1b1** and **1b2**); these belong to the structure with the cyclometalated moieties pointing to the same side (**1b1**) and to different sides (**1b2**). To the purpose of this reaction calculation the ion Cl<sup>-</sup> has also been computed at the same level as the others. The aim of this study is to determine which of the molecules is more stable from a thermodynamic point of view (**1b** or **2b**). The following equation has been used to calculate  $\Delta G$  for the formation of **2b**:

$$\Delta G_{\text{reaction}} = \Delta G_{2b} - 2 \times (\Delta G_{1b} + \Delta G_{\text{Cl}^-})$$

The experimental part shows that, besides both compounds are formed during the reaction process (see NMR data), the A-frame complex (**2b**) shows higher thermodynamic stability being

<sup>2</sup> M. J. Frisch *et al.* *Gaussian 09*, Revision D.01; Gaussian, Inc., Wallingford CT, **2013**.

<sup>3</sup> P. J. Hay and W. R. Wadt, *J. Chem. Phys.* **1985**, *82*, 270-283.

always the only one that crystallises and this is also corroborated by the DFT calculations which determine that the  $\Delta G$  of the reaction is equal to -171Kcal/mol.

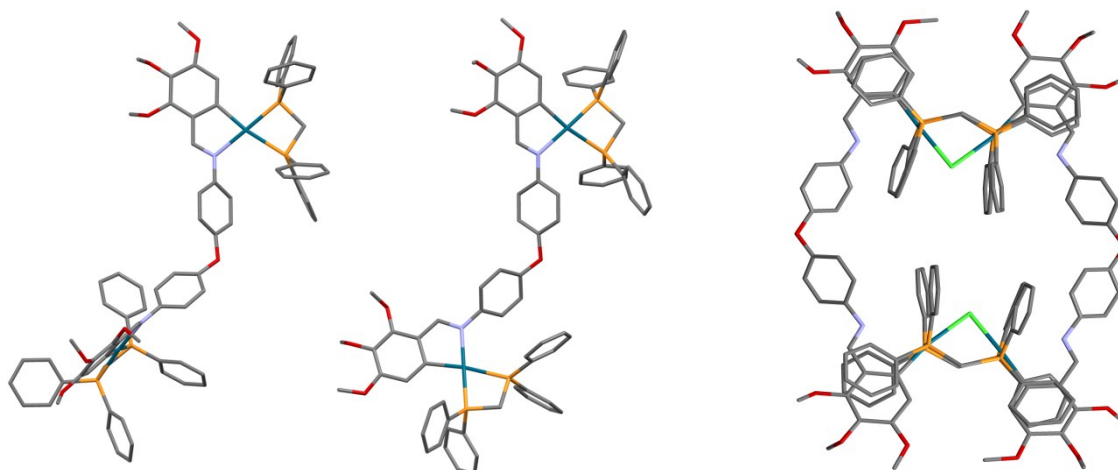

**Figure 2ESI.** Structures optimised in this paper. From left to the right **1b1**, **1b2** and **2b**.

The difference between **1b1** and **1b2** is 0.65 kcal/mol, so they are almost isoenergetic, which means that the  $C\hat{O}C$  angle has free rotation and not major steric hindrance is present.

In the tables below a compilation of the distances and angles that suffer changes during the reaction of formation of **2b** is shown, together with the calculated structures of the compounds **1b1** and **1b2** and A-frame (Scheme 2ESI)

**Table 7** Comparison of the main angles in  $^{\circ}$ . Here it can be noticed that the  $CC=N$  and  $PCH_2P$  are bigger in the A-frame compound giving less constricted cycles, thus more stable.

| Angle            | 2b       | 1b1      | 1b2      |
|------------------|----------|----------|----------|
|                  | 123.2307 |          |          |
|                  | 1        |          |          |
|                  | 123.1937 | 119.3110 | 119.3277 |
|                  | 3        | 5        | 9        |
| CC=N             | 123.1929 | 119.1926 | 119.3560 |
|                  | 4        | 4        | 4        |
|                  | 123.1630 |          |          |
|                  | 5        |          |          |
|                  | 115.0105 |          |          |
|                  | 0        |          |          |
|                  | 117.1924 |          |          |
| PCH <sub>2</sub> | 9        | 99.38091 | 99.29091 |
| P                | 117.1924 | 99.28186 | 98.88648 |
|                  | 9        |          |          |
|                  | 114.9866 |          |          |
|                  | 9        |          |          |
| COC              | 118.3220 | 121.0051 | 121.5760 |
|                  | 118.3430 |          |          |
